# Supplementary material for: Autoantibody discovery across monogenic, acquired, and COVID-19-associated autoimmunity with scalable PhIP-seq
Source: eLife. 2022 Oct 27;11:e78550. doi: 10.7554/eLife.78550 (PMC9711525; doi:10.7554/eLife.78550)
Supplement: Supplementary file 1. [file elife-78550-supp1.xlsx]

## Sheet: Fig234-APS1
file_name	method	ID-reps	ID	cohort	category_adj	reps	Gender	POF	CMC	HP	AI	AIH	HT	DM	TF	OF	ID	Gastritis	TIN	EH	ND	KC	HTN	SS	Hpit	Pneumonitis	Urticaria	Vitiligo	Alopecia	B12 def	GH def	Asplenia	Last_age	Label ID	Patient Code	Intestinal Dysfunction	ID_type	Enteroendocrine cells present	ID correction	hypogonadism
plate5_B1_Dual-097_20200702_AIREMUT_33376_S338_R1_001_gene.csv	vacuum	33376	33376	LionakisNIH	APS1	R1	F	0	1	1	1	1	0	0	0	0	1	1	0	1	0	0	1	0	0	1	1	1	0	0	0	0	11	CNML033376	AIRE.05	1	B	NE	1
plate5_C1_Dual-097_20200702_AIREMUT_33627_S339_R1_001_gene.csv	vacuum	33627	33627	LionakisNIH	APS1	R1	F	0	0	1	0	1	0	0	0	0	0	0	0	1	0	0	0	0	0	1	1	0	0	0	0	0	10	CNML033627	AIRE.09	0	none	NE	0
plate5_D1_Dual-097_20200702_AIREMUT_33835_S340_R1_001_gene.csv	vacuum	33835	33835	LionakisNIH	APS1	R1	F	0	1	1	1	0	0	0	0	0	1	1	0	0	0	0	0	0	0	0	1	1	0	0	0	0	10	CNML033835	AIRE.13	1	D	0	1
plate5_F1_Dual-097_20200702_AIREMUT_35209_S342_R1_001_gene.csv	vacuum	35209	35209	LionakisNIH	APS1	R1	F	1	1	1	1	0	0	0	0	1	0	0	0	0	1	0	0	1	0	0	0	0	0	0	0	0	18	CNML035209	AIRE.18	0	none	NE	0
plate5_G1_Dual-097_20200702_AIREMUT_35331_S343_R1_001_gene.csv	vacuum	35331	35331	LionakisNIH	APS1	R1	M	n/a	1	1	1	1	0	0	0	0	1	1	0	1	0	0	0	0	0	1	1	0	0	0	1	1	12	CNML035331	AIRE.19	1	B	NE	1
plate5_H1_Dual-097_20200702_AIREMUT_35376_S344_R1_001_gene.csv	vacuum	35376	35376	LionakisNIH	APS1	R1	F	0	1	0	1	0	0	0	0	0	1	1	0	1	0	1	0	1	0	0	0	0	0	0	0	0	25	CNML035376	AIRE.20	1	D	1	1
plate6_B2_Dual-101_20200702_AIREMUT_36015_S42_R1_001_gene.csv	vacuum	36015-2	36015	LionakisNIH	APS1	R2-ignore	M	n/a	1	1	1	0	0	0	0	0	1	1	1	1	1	1	1	0	0	0	0	1	1	1	0	1	38	CNML036015	AIRE.23	1	D	1	1
plate6_B10_Dual-101_20200702_AIREMUT_36015_S106_R1_001_gene.csv	vacuum	36015-1	36015	LionakisNIH	APS1	R1	M	n/a	1	1	1	0	0	0	0	0	1	1	1	1	1	1	1	0	0	0	0	1	1	1	0	1	38	CNML036015	AIRE.23	1	D	1	1
plate6_C2_Dual-101_20200702_AIREMUT_36137_S43_R1_001_gene.csv	vacuum	36137-2	36137	LionakisNIH	APS1	R2-ignore	F	0	1	1	1	1	0	0	0	0	1	1	0	1	0	1	0	0	0	0	0	0	0	0	0	0	15	CNML036137	AIRE.24	1	C	1	1
plate6_C10_Dual-101_20200702_AIREMUT_36137_S107_R1_001_gene.csv	vacuum	36137-1	36137	LionakisNIH	APS1	R1	F	0	1	1	1	1	0	0	0	0	1	1	0	1	0	1	0	0	0	0	0	0	0	0	0	0	15	CNML036137	AIRE.24	1	C	1	1
plate6_E2_Dual-101_20200702_AIREMUT_36993_S45_R1_001_gene.csv	vacuum	36993-2	36993	LionakisNIH	APS1	R2-ignore	M	n/a	1	1	1	0	0	0	0	0	0	0	0	1	0	0	0	0	0	0	1	0	0	0	0	0	11	CNML036993	AIRE.08	0	none	NE	0
plate6_E10_Dual-101_20200702_AIREMUT_36993_S109_R1_001_gene.csv	vacuum	36993-1	36993	LionakisNIH	APS1	R1	M	n/a	1	1	1	0	0	0	0	0	0	0	0	1	0	0	0	0	0	0	1	0	0	0	0	0	11	CNML036993	AIRE.08	0	none	NE	0
plate6_F2_Dual-101_20200702_AIREMUT_37019_S46_R1_001_gene.csv	vacuum	37019-2	37019	LionakisNIH	APS1	R2-ignore	M	n/a	1	1	1	0	1	0	0	0	1	0	0	0	1	1	0	0	0	0	0	0	1	0	0	0	12	CNML037019	AIRE.07	1	C	1	1
plate6_F10_Dual-101_20200702_AIREMUT_37019_S110_R1_001_gene.csv	vacuum	37019-1	37019	LionakisNIH	APS1	R1	M	n/a	1	1	1	0	1	0	0	0	1	0	0	0	1	1	0	0	0	0	0	0	1	0	0	0	12	CNML037019	AIRE.07	1	C	1	1
plate6_G2_Dual-101_20200702_AIREMUT_37096_S47_R1_001_gene.csv	vacuum	37096-2	37096	LionakisNIH	APS1	R2-ignore	M	n/a	1	1	1	0	0	0	0	0	1	1	0	1	0	1	0	0	0	1	0	1	0	0	0	0	15	CNML037096	AIRE.28	1	C	0	1
plate6_G10_Dual-101_20200702_AIREMUT_37096_S111_R1_001_gene.csv	vacuum	37096-1	37096	LionakisNIH	APS1	R1	M	n/a	1	1	1	0	0	0	0	0	1	1	0	1	0	1	0	0	0	1	0	1	0	0	0	0	15	CNML037096	AIRE.28	1	C	0	1
plate6_H2_Dual-101_20200702_AIREMUT_37176_S48_R1_001_gene.csv	vacuum	37176-2	37176	LionakisNIH	APS1	R2-ignore	F	0	1	1	0	1	0	0	0	0	1	1	0	1	1	0	0	1	0	1	1	0	1	0	1	0	7	CNML037176	AIRE.22	1	D	NE	1
plate6_H10_Dual-101_20200702_AIREMUT_37176_S112_R1_001_gene.csv	vacuum	37176-1	37176	LionakisNIH	APS1	R1	F	0	1	1	0	1	0	0	0	0	1	1	0	1	1	0	0	1	0	1	1	0	1	0	1	0	7	CNML037176	AIRE.22	1	D	NE	1
plate5_A3_Dual-097_20200702_AIREMUT_38061_S353_R1_001_gene.csv	vacuum	38061	38061	LionakisNIH	APS1	R1	M	n/a	0	0	1	1	0	0	0	0	1	0	0	1	1	0	0	0	0	0	1	1	1	0	0	0	9	CNML038061	AIRE.29	1	B	0	1
plate5_B3_Dual-097_20200702_AIREMUT_38136_S354_R1_001_gene.csv	vacuum	38136	38136	LionakisNIH	APS1	R1	M	n/a	1	1	0	1	0	0	0	0	1	0	0	1	0	0	0	0	0	0	1	1	1	1	0	0	17	CNML038136	AIRE.30	0	C	NE	1
plate5_C3_Dual-097_20200702_AIREMUT_38217_S355_R1_001_gene.csv	vacuum	38217	38217	LionakisNIH	APS1	R1	F	1	1	1	1	0	1	0	0	1	0	0	0	1	0	0	0	1	0	0	0	0	0	0	0	0	41	CNML038217	AIRE.23c	0	none	NE	0
plate5_E3_Dual-097_20200702_AIREMUT_38472_S357_R1_001_gene.csv	vacuum	38472	38472	LionakisNIH	APS1	R1	F	1	0	1	1	1	0	0	0	1	1	0	0	1	0	0	0	0	0	0	1	0	0	0	0	0	14	CNML038472	AIRE.33	0	D	1	1
plate5_F3_Dual-097_20200702_AIREMUT_38534_S358_R1_001_gene.csv	vacuum	38534	38534	LionakisNIH	APS1	R1	F	1	1	1	1	0	1	0	0	1	1	1	0	1	0	0	1	1	0	1	0	0	0	1	0	0	54	CNML038534	AIRE.34	1	D	0	1
plate5_G3_Dual-097_20200702_AIREMUT_38603_S359_R1_001_gene.csv	vacuum	38603	38603	LionakisNIH	APS1	R1	F	1	1	1	1	1	1	0	0	1	1	1	0	1	0	0	0	1	0	1	1	0	0	1	0	1	23	CNML038603	AIRE.35	1	D	NE	1
plate6_A4_Dual-101_20200702_AIREMUT_39206_S57_R1_001_gene.csv	vacuum	39206	39206	LionakisNIH	APS1	R1	M	n/a	0	1	1	0	0	0	0	0	0	0	0	1	0	0	0	0	0	0	0	0	1	0	0	0	15	CNML039206	AIRE.36	0	none	NE	0
plate6_B4_Dual-101_20200702_AIREMUT_39308_S58_R1_001_gene.csv	vacuum	39308	39308	LionakisNIH	APS1	R1	F	1	1	1	1	0	0	0	0	1	1	0	0	1	0	0	0	1	0	0	1	0	0	0	0	0	28	CNML039308	AIRE.37	1	D	NE	1
plate6_C4_Dual-101_20200702_AIREMUT_39527_S59_R1_001_gene.csv	vacuum	39527	39527	LionakisNIH	APS1	R1	F	0	0	1	1	0	0	0	0	0	1	0	0	1	1	0	0	0	0	0	1	0	1	0	0	0	7	CNML039527	AIRE.38	1	C	NE	1
plate6_D4_Dual-101_20200702_AIREMUT_40435_S60_R1_001_gene.csv	vacuum	40435	40435	LionakisNIH	APS1	R1	F	0	1	1	0	0	0	0	0	0	1	0	0	1	0	1	0	0	0	0	1	0	0	0	0	0	6	CNML040435	AIRE.17	1	D	0	1
plate6_E4_Dual-101_20200702_AIREMUT_41061_S61_R1_001_gene.csv	vacuum	41061	41061	LionakisNIH	APS1	R1	F	0	1	1	1	1	1	0	0	0	1	0	0	1	1	1	0	0	0	1	1	0	0	0	0	0	18	CNML041061	AIRE.39	1	B	0	1
plate6_F4_Dual-101_20200702_AIREMUT_41183_S62_R1_001_gene.csv	vacuum	41183	41183	LionakisNIH	APS1	R1	F	1	1	1	1	1	0	0	0	1	1	0	0	1	0	0	0	0	0	1	1	0	1	0	0	1	16	CNML041183	AIRE.40	1	D	0	1
plate6_H4_Dual-101_20200702_AIREMUT_41886_S64_R1_001_gene.csv	vacuum	41886	41886	LionakisNIH	APS1	R1	F	1	1	1	1	0	0	0	0	1	0	1	0	1	1	1	1	1	0	0	1	0	1	1	0	0	24	CNML041886	AIRE.44	1	D	1	1
plate5_A5_Dual-097_20200702_AIREMUT_42164_S369_R1_001_gene.csv	vacuum	42164	42164	LionakisNIH	APS1	R1	F	0	1	1	1	0	0	0	0	0	1	0	0	1	0	1	0	1	0	0	0	0	0	1	1	0	22	CNML042164	AIRE.46	1	B	1	1
plate5_B5_Dual-097_20200702_AIREMUT_42385_S370_R1_001_gene.csv	vacuum	42385	42385	LionakisNIH	APS1	R1	F	0	1	1	1	0	0	0	0	0	1	1	0	1	0	1	0	1	0	1	1	1	0	1	0	0	7	CNML042385	AIRE.12	1	D	NE	1
plate5_C5_Dual-097_20200702_AIREMUT_43746_S371_R1_001_gene.csv	vacuum	43746	43746	LionakisNIH	APS1	R1	F	0	1	1	1	1	1	0	0	0	1	1	0	1	0	0	1	1	0	0	0	1	0	0	0	0	16	CNML043746	AIRE.06	1	D	NE	1
plate5_F5_Dual-097_20200702_AIREMUT_44270_S374_R1_001_gene.csv	vacuum	44270	44270	LionakisNIH	APS1	R1	F	1	0	1	1	0	0	0	0	1	0	0	1	1	0	0	1	0	0	1	1	0	0	0	0	0	19	CNML044270	AIRE.03	0	none	1	0
plate5_G5_Dual-097_20200702_AIREMUT_44645_S375_R1_001_gene.csv	vacuum	44645	44645	LionakisNIH	APS1	R1	F	0	0	1	0	0	1	0	0	0	1	0	0	1	0	0	0	0	0	0	1	1	0	0	0	0	9	CNML044645	AIRE.52	1	D	NE	1
plate5_H5_Dual-097_20200702_AIREMUT_46354_S376_R1_001_gene.csv	vacuum	46354	46354	LionakisNIH	APS1	R1	F	0	1	1	1	0	1	0	0	0	1	0	0	1	0	0	1	0	0	0	1	0	0	0	0	0	8	CNML046354	AIRE.53	1	D	0	1
plate6_B6_Dual-101_20200702_AIREMUT_46645_S74_R1_001_gene.csv	vacuum	46645	46645	LionakisNIH	APS1	R1	M	n/a	1	1	1	0	0	0	0	0	1	0	0	1	1	0	0	0	0	0	0	0	1	0	0	0	7	CNML046645	AIRE.59	1	D	NE	1
plate6_C6_Dual-101_20200702_AIREMUT_46943_S75_R1_001_gene.csv	vacuum	46943	46943	LionakisNIH	APS1	R1	M	n/a	1	1	1	0	0	0	0	0	1	0	0	1	0	0	0	0	0	0	0	0	1	0	0	0	19	CNML046943	AIRE.60	1	C	1	1
plate6_D6_Dual-101_20200702_AIREMUT_47050_S76_R1_001_gene.csv	vacuum	47050	47050	LionakisNIH	APS1	R1	F	0	1	1	1	0	0	0	0	0	1	0	0	1	0	0	0	1	0	1	0	0	0	0	0	0	54	CNML047050	AIRE.61	1	C	NE	1
plate6_F6_Dual-101_20200702_AIREMUT_47288_S78_R1_001_gene.csv	vacuum	47288	47288	LionakisNIH	APS1	R1	M	n/a	1	1	1	0	0	0	0	0	0	1	0	1	0	0	0	0	0	0	1	0	1	0	0	0	19	CNML047288	AIRE.55	0	none	1	0
plate6_G6_Dual-101_20200702_AIREMUT_48773_S79_R1_001_gene.csv	vacuum	48773	48773	LionakisNIH	APS1	R1	M	n/a	1	0	1	1	0	0	0	0	1	0	0	0	0	0	0	0	0	0	0	0	0	0	0	0	18	CNML048773	AIRE.69	1	B	NE	1
plate6_H6_Dual-101_20200702_AIREMUT_48934_S80_R1_001_gene.csv	vacuum	48934	48934	LionakisNIH	APS1	R1	M	n/a	0	0	0	1	0	0	0	0	0	0	0	1	0	0	0	0	0	0	1	0	0	0	0	0	2	CNML048934	AIRE.56	1	D	NE	1
plate5_A7_Dual-097_20200702_AIREMUT_49156_S385_R1_001_gene.csv	vacuum	49156	49156	LionakisNIH	APS1	R1	F	0	1	1	1	0	0	0	0	0	0	0	0	1	0	0	0	0	0	1	1	0	0	0	0	0	7	CNML049156	AIRE.54	0	none	1	0
plate5_B7_Dual-097_20200702_AIREMUT_49302_S386_R1_001_gene.csv	vacuum	49302	49302	LionakisNIH	APS1	R1	F	0	1	1	1	0	0	0	0	0	0	0	0	1	0	0	0	0	0	0	0	0	0	1	0	0	15	CNML049302	AIRE.63	1	B	NE	1
plate5_C7_Dual-097_20200702_AIREMUT_50075_S387_R1_001_gene.csv	vacuum	50075	50075	LionakisNIH	APS1	R1	F	0	1	1	0	0	0	0	0	0	1	1	0	1	0	0	0	0	0	1	0	1	0	0	0	0	30	CNML050075	AIRE.71	1	D	0	1
plate5_D7_Dual-097_20200702_AIREMUT_50076_S388_R1_001_gene.csv	vacuum	50076	50076	LionakisNIH	APS1	R1	M	n/a	1	0	1	0	1	0	0	0	0	1	0	0	1	0	0	0	0	1	0	0	1	0	0	0	15	CNML050076	AIRE.71B	0	none	1	0
plate5_E7_Dual-097_20200702_AIREMUT_50333_S389_R1_001_gene.csv	vacuum	50333	50333	LionakisNIH	APS1	R1	F	0	1	1	1	0	1	0	0	0	1	1	1	1	0	0	0	1	0	1	1	0	1	0	0	0	11	CNML050333	AIRE.74	1	C	1	1
plate6_A8_Dual-101_20200702_AIREMUT_51885_S89_R1_001_gene.csv	vacuum	51885	51885	LionakisNIH	APS1	R1	M	n/a	1	1	1	0	0	0	0	0	1	0	0	0	0	0	0	0	0	1	1	1	0	0	0	0	20	CNML051885	AIRE.67	1	D	NE	1
plate6_B8_Dual-101_20200702_AIREMUT_52221_S90_R1_001_gene.csv	vacuum	52221	52221	LionakisNIH	APS1	R1	F	0	1	1	1	1	1	0	0	0	1	0	0	1	0	0	0	0	0	1	0	1	0	1	0	0	15	CNML052221	AIRE.87	1	B	NE	1
plate6_C8_Dual-101_20200702_AIREMUT_52277_S91_R1_001_gene.csv	vacuum	52277	52277	LionakisNIH	APS1	R1	M	n/a	1	1	1	0	0	0	0	0	0	0	0	0	0	0	0	0	0	0	1	0	0	0	0	0	2	CNML052277	AIRE.65C	1	C	NE	1
plate6_D8_Dual-101_20200702_AIREMUT_52278_S92_R1_001_gene.csv	vacuum	52278	52278	LionakisNIH	APS1	R1	M	n/a	1	1	1	0	0	0	0	0	1	0	0	1	0	0	0	0	0	0	0	0	0	0	0	0	6	CNML052278	AIRE.65B	0	none	NE	0
plate6_E8_Dual-101_20200702_AIREMUT_52279_S93_R1_001_gene.csv	vacuum	52279	52279	LionakisNIH	APS1	R1	F	0	1	1	1	0	0	0	0	0	1	0	0	1	0	0	0	0	0	0	1	1	0	0	1	0	11	CNML052279	AIRE.65	1	D	NE	1
plate6_F8_Dual-101_20200702_AIREMUT_52729_S94_R1_001_gene.csv	vacuum	52729	52729	LionakisNIH	APS1	R1	F	1	1	1	0	1	1	0	0	1	1	0	0	1	0	0	0	0	0	0	0	0	0	0	0	0	13	CNML052729	AIRE.73	1	B	NE	1
plate6_G8_Dual-101_20200702_AIREMUT_53145_S95_R1_001_gene.csv	vacuum	53145	53145	LionakisNIH	APS1	R1	M	n/a	1	1	0	0	0	0	0	0	1	0	0	0	0	0	0	0	0	0	1	1	0	0	0	0	10	CNML053145	AIRE.76	1	D	NE	1
plate6_H8_Dual-101_20200702_AIREMUT_53282_S96_R1_001_gene.csv	vacuum	53282	53282	LionakisNIH	APS1	R1	F	0	0	1	0	0	0	0	0	0	0	0	0	0	0	0	0	0	0	0	1	0	0	0	0	0	3	CNML053282	AIRE.86	1	C	NE	1
plate5_E9_Dual-097_20200702_AIREMUT_53550_S5_R1_001_gene.csv	vacuum	53550-2	53550	LionakisNIH	APS1	R2-ignore	M	n/a	0	1	0	0	0	0	0	0	0	0	0	0	0	0	0	0	0	0	0	0	0	0	0	0	2	CNML053550	AIRE.78	0	none	NE	0
plate5_B9_Dual-097_20200702_AIREMUT_53550_S2_R1_001_gene.csv	vacuum	53550-1	53550	LionakisNIH	APS1	R1	M	n/a	0	1	0	0	0	0	0	0	0	0	0	0	0	0	0	0	0	0	0	0	0	0	0	0	2	CNML053550	AIRE.78	0	none	NE	0
plate5_F9_Dual-097_20200702_AIREMUT_53934_S6_R1_001_gene.csv	vacuum	53934-2	53934	LionakisNIH	APS1	R2-ignore	M	n/a	1	1	1	1	0	0	0	0	0	0	0	1	0	0	0	0	0	0	1	0	0	0	1	1	10	CNML053934	AIRE.79	0	none	NE	0
plate5_C9_Dual-097_20200702_AIREMUT_53934_S3_R1_001_gene.csv	vacuum	53934-1	53934	LionakisNIH	APS1	R1	M	n/a	1	1	1	1	0	0	0	0	0	0	0	1	0	0	0	0	0	0	1	0	0	0	1	1	10	CNML053934	AIRE.79	0	none	NE	0
plate5_H3_Dual-097_20200702_AIREMUT_39037_S360_R1_001_gene.csv	vacuum	39037	39037	LionakisNIH	APS1	R1	M	n/a	1	1	1	1	0	0	1	0	1	1	0	1	0	0	0	1	0	0	1	1	0	0	1	0	19	CNML039037	AIRE.11	1	B	0	1
plate6_G4_Dual-101_20200702_AIREMUT_41737_S63_R1_001_gene.csv	vacuum	41737	41737	LionakisNIH	APS1	R1	M	n/a	1	0	1	0	1	0	1	0	1	0	0	1	0	0	1	0	0	0	0	1	1	0	0	0	20	CNML041737	AIRE.41	1	D	0	1
plate5_E5_Dual-097_20200702_AIREMUT_44121_S373_R1_001_gene.csv	vacuum	44121	44121	LionakisNIH	APS1	R1	M	n/a	1	1	1	0	0	0	1	0	1	1	0	1	0	0	1	1	1	1	0	1	0	1	0	0	51	CNML044121	AIRE.02	1	D	1	1
plate6_A6_Dual-101_20200702_AIREMUT_46506_S73_R1_001_gene.csv	vacuum	46506	46506	LionakisNIH	APS1	R1	M	n/a	1	1	1	0	0	0	1	0	1	1	0	1	1	1	0	0	0	0	0	0	1	1	0	0	16	CNML046506	AIRE.58	1	D	1	1
plate3_A1_Dual-095_20200702_AIREMUT_APSKAM_01_S145_R1_001_gene.csv	vacuum	APSKAM-01	APSKAM-01	KampeKI	APS1	R1	F			1	1	0		0			0											1	1	0			NA							1
plate3_B1_Dual-095_20200702_AIREMUT_APSKAM_02_S146_R1_001_gene.csv	vacuum	APSKAM-02	APSKAM-02	KampeKI	APS1	R1	M			0	1	1		0			0											0	1	0			NA							0
plate3_C1_Dual-095_20200702_AIREMUT_APSKAM_03_S147_R1_001_gene.csv	vacuum	APSKAM-03	APSKAM-03	KampeKI	APS1	R1	M			1	1	0		0			0											1	1	0			NA							0
plate3_D1_Dual-095_20200702_AIREMUT_APSKAM_04_S148_R1_001_gene.csv	vacuum	APSKAM-04	APSKAM-04	KampeKI	APS1	R1	F			1	1	1		0			1											0	0	0			NA							0
plate3_E1_Dual-095_20200702_AIREMUT_APSKAM_05_S149_R1_001_gene.csv	vacuum	APSKAM-05	APSKAM-05	KampeKI	APS1	R1	F			1	0	0		0			0											1	0	0			NA							0
plate3_F1_Dual-095_20200702_AIREMUT_APSKAM_06_S150_R1_001_gene.csv	vacuum	APSKAM-06	APSKAM-06	KampeKI	APS1	R1	M			1	0	0		0			0											0	0	0			29							0
plate3_G1_Dual-095_20200702_AIREMUT_APSKAM_07_S151_R1_001_gene.csv	vacuum	APSKAM-07	APSKAM-07	KampeKI	APS1	R1	M			1	1	0		0			1											0	0	0			17							0
plate3_H1_Dual-095_20200702_AIREMUT_APSKAM_08_S152_R1_001_gene.csv	vacuum	APSKAM-08	APSKAM-08	KampeKI	APS1	R1	F			1	1	0		0			0											1	0	1			20							0
plate4_A2_Dual-096_20200702_AIREMUT_APSKAM_09_S249_R1_001_gene.csv	vacuum	APSKAM-09	APSKAM-09	KampeKI	APS1	R1	F			1	0	0		0			0											0	0	0			20							0
plate4_B2_Dual-096_20200702_AIREMUT_APSKAM_10_S250_R1_001_gene.csv	vacuum	APSKAM-10	APSKAM-10	KampeKI	APS1	R1	M			1	1	0		0			0											0	0	1			50							1
plate4_C2_Dual-096_20200702_AIREMUT_APSKAM_11_S251_R1_001_gene.csv	vacuum	APSKAM-11	APSKAM-11	KampeKI	APS1	R1	F			1	1	1		0			0											0	0	0			21							1
plate4_D2_Dual-096_20200702_AIREMUT_APSKAM_12_S252_R1_001_gene.csv	vacuum	APSKAM-12	APSKAM-12	KampeKI	APS1	R1	M			0	1	0		0			0											0	0	0			26							0
plate4_E2_Dual-096_20200702_AIREMUT_APSKAM_13_S253_R1_001_gene.csv	vacuum	APSKAM-13	APSKAM-13	KampeKI	APS1	R1	M			1	1	0		0			0											0	1	0			10							0
plate4_F2_Dual-096_20200702_AIREMUT_APSKAM_14_S254_R1_001_gene.csv	vacuum	APSKAM-14	APSKAM-14	KampeKI	APS1	R1	F			1	1	0		0			1											1	1	0			36							0
plate4_G2_Dual-096_20200702_AIREMUT_APSKAM_15_S255_R1_001_gene.csv	vacuum	APSKAM-15	APSKAM-15	KampeKI	APS1	R1	F			1	1	1		0			0											0	0	0			14							0
plate4_H2_Dual-096_20200702_AIREMUT_APSKAM_16_S256_R1_001_gene.csv	vacuum	APSKAM-16	APSKAM-16	KampeKI	APS1	R1	F			1	0	0		0			0											1	0	0			33							0
plate3_A3_Dual-095_20200702_AIREMUT_APSKAM_17_S161_R1_001_gene.csv	vacuum	APSKAM-17	APSKAM-17	KampeKI	APS1	R1	M			1	1	0		0			0											0	1	0			27							1
plate3_B3_Dual-095_20200702_AIREMUT_APSKAM_18_S162_R1_001_gene.csv	vacuum	APSKAM-18	APSKAM-18	KampeKI	APS1	R1	M			1	1	0		0			0											0	0	0			40							1
plate3_E3_Dual-095_20200702_AIREMUT_APSKAM_21_S165_R1_001_gene.csv	vacuum	APSKAM-21	APSKAM-21	KampeKI	APS1	R1	M			1	1	0		0			0											0	0	0			34							1
plate3_F3_Dual-095_20200702_AIREMUT_APSKAM_22_S166_R1_001_gene.csv	vacuum	APSKAM-22	APSKAM-22	KampeKI	APS1	R1	M			1	1	1		0			1											0	1	0			44							0
plate3_G3_Dual-095_20200702_AIREMUT_APSKAM_23_S167_R1_001_gene.csv	vacuum	APSKAM-23	APSKAM-23	KampeKI	APS1	R1	M			1	1	0		0			0											1	1	0			27							0
plate4_B4_Dual-096_20200702_AIREMUT_APSKAM_26_S266_R1_001_gene.csv	vacuum	APSKAM-26	APSKAM-26	KampeKI	APS1	R1	F			1	1	0		0			0											0	0	0			30							1
plate4_C4_Dual-096_20200702_AIREMUT_APSKAM_27_S267_R1_001_gene.csv	vacuum	APSKAM-27	APSKAM-27	KampeKI	APS1	R1	F			0	1	0		0			0											0	0	0			33							1
plate4_D4_Dual-096_20200702_AIREMUT_APSKAM_28_S268_R1_001_gene.csv	vacuum	APSKAM-28	APSKAM-28	KampeKI	APS1	R1	M			1	1	0		0			0											0	1	1			59							0
plate4_E4_Dual-096_20200702_AIREMUT_APSKAM_29_S269_R1_001_gene.csv	vacuum	APSKAM-29	APSKAM-29	KampeKI	APS1	R1	F			1	1	1		0			1											0	1	0			14							1
plate4_F4_Dual-096_20200702_AIREMUT_APSKAM_30_S270_R1_001_gene.csv	vacuum	APSKAM-30	APSKAM-30	KampeKI	APS1	R1	M			0	1	0		0			0											0	0	0			24							0
plate4_G4_Dual-096_20200702_AIREMUT_APSKAM_31_S271_R1_001_gene.csv	vacuum	APSKAM-31	APSKAM-31	KampeKI	APS1	R1	M			0	1	0		0			0											0	1	0			24							0
plate4_H4_Dual-096_20200702_AIREMUT_APSKAM_32_S272_R1_001_gene.csv	vacuum	APSKAM-32	APSKAM-32	KampeKI	APS1	R1	M			0	1	0		0			1											1	1	0			14							0
plate3_A5_Dual-095_20200702_AIREMUT_APSKAM_33_S177_R1_001_gene.csv	vacuum	APSKAM-33	APSKAM-33	KampeKI	APS1	R1	F			1	1	1		0			0											0	0	0			12							0
plate3_B5_Dual-095_20200702_AIREMUT_APSKAM_34_S178_R1_001_gene.csv	vacuum	APSKAM-34	APSKAM-34	KampeKI	APS1	R1	M			1	1	1		0			0											0	0	0			16							0
plate3_D5_Dual-095_20200702_AIREMUT_APSKAM_36_S180_R1_001_gene.csv	vacuum	APSKAM-36	APSKAM-36	KampeKI	APS1	R1	F			1	1	0		0			0											1	0	0			39							1
plate3_E5_Dual-095_20200702_AIREMUT_APSKAM_37_S181_R1_001_gene.csv	vacuum	APSKAM-37	APSKAM-37	KampeKI	APS1	R1	M			1	1	0		0			0											1	1	0			25							0
plate3_F5_Dual-095_20200702_AIREMUT_APSKAM_38_S182_R1_001_gene.csv	vacuum	APSKAM-38	APSKAM-38	KampeKI	APS1	R1	F			1	1	0		0			0											0	1	0			25							1
plate3_H5_Dual-095_20200702_AIREMUT_APSKAM_40_S184_R1_001_gene.csv	vacuum	APSKAM-40	APSKAM-40	KampeKI	APS1	R1	F			1	1	1		0			1											0	0	0			17							1
plate5_A1_Dual-097_20200702_AIREMUT_32997_S337_R1_001_gene.csv	vacuum	32997	32997	LionakisNIH	APS1	R1	F	0	1	1	1	0	0	1	0	0	1	0	0	1	1	0	1	1	0	1	1	0	0	0	1	0	14	CNML032997	AIRE.04	1	D	NE	1
plate5_E1_Dual-097_20200702_AIREMUT_34392_S341_R1_001_gene.csv	vacuum	34392	34392	LionakisNIH	APS1	R1	M	n/a	1	0	1	1	0	1	0	0	1	1	0	1	1	1	0	1	0	1	1	1	0	1	0	0	7	CNML034392	AIRE.14	1	C	NE	1
plate6_A2_Dual-101_20200702_AIREMUT_35520_S41_R1_001_gene.csv	vacuum	35520-2	35520	LionakisNIH	APS1	R2-ignore	M	n/a	1	1	1	0	1	1	0	0	1	0	0	1	0	0	1	1	0	0	0	1	0	1	0	0	65	CNML035520	AIRE.21	1	B	1	1
plate6_A10_Dual-101_20200702_AIREMUT_35520_S105_R1_001_gene.csv	vacuum	35520-1	35520	LionakisNIH	APS1	R1	M	n/a	1	1	1	0	1	1	0	0	1	0	0	1	0	0	1	1	0	0	0	1	0	1	0	0	65	CNML035520	AIRE.21	1	B	1	1
plate6_D2_Dual-101_20200702_AIREMUT_36849_S44_R1_001_gene.csv	vacuum	36849-2	36849	LionakisNIH	APS1	R2-ignore	M	n/a	1	0	1	1	0	1	0	0	1	1	0	1	0	1	0	1	0	1	1	1	0	1	0	0	18	CNML036849	AIRE.27	1	B	1	1
plate6_D10_Dual-101_20200702_AIREMUT_36849_S108_R1_001_gene.csv	vacuum	36849-1	36849	LionakisNIH	APS1	R1	M	n/a	1	0	1	1	0	1	0	0	1	1	0	1	0	1	0	1	0	1	1	1	0	1	0	0	18	CNML036849	AIRE.27	1	B	1	1
plate5_D3_Dual-097_20200702_AIREMUT_38285_S356_R1_001_gene.csv	vacuum	38285	38285	LionakisNIH	APS1	R1	F	0	1	1	1	1	0	1	0	0	1	0	0	1	1	1	0	1	0	0	1	1	0	0	0	0	18	CNML038285	AIRE.31	1	D	NE	1
plate5_H7_Dual-097_20200702_AIREMUT_51533_S392_R1_001_gene.csv	vacuum	51533	51533	LionakisNIH	APS1	R1	M	n/a	1	1	1	0	0	1	0	0	0	0	0	1	0	0	0	0	0	0	1	0	1	0	0	0	13	CNML051533	AIRE.66	0	none	NE	0
plate3_C3_Dual-095_20200702_AIREMUT_APSKAM_19_S163_R1_001_gene.csv	vacuum	APSKAM-19	APSKAM-19	KampeKI	APS1	R1	M			0	1	0		1			1											0	0	1			50							0
plate3_D3_Dual-095_20200702_AIREMUT_APSKAM_20_S164_R1_001_gene.csv	vacuum	APSKAM-20	APSKAM-20	KampeKI	APS1	R1	F			1	1	0		1			1											0	0	1			32							1
plate3_H3_Dual-095_20200702_AIREMUT_APSKAM_24_S168_R1_001_gene.csv	vacuum	APSKAM-24	APSKAM-24	KampeKI	APS1	R1	F			1	1	0		1			1											0	0	0			37							1
plate4_A4_Dual-096_20200702_AIREMUT_APSKAM_25_S265_R1_001_gene.csv	vacuum	APSKAM-25	APSKAM-25	KampeKI	APS1	R1	M			1	1	0		1			0											0	0	0			32							0
plate3_C5_Dual-095_20200702_AIREMUT_APSKAM_35_S179_R1_001_gene.csv	vacuum	APSKAM-35	APSKAM-35	KampeKI	APS1	R1	F			1	1	0		1			1											1	0	0			42							1
plate3_G5_Dual-095_20200702_AIREMUT_APSKAM_39_S183_R1_001_gene.csv	vacuum	APSKAM-39	APSKAM-39	KampeKI	APS1	R1	M			1	1	0		1			0											0	0	0			30							1
plate4_A6_Dual-096_20200702_AIREMUT_AP-1_S281_R1_001_gene.csv	vacuum	AP-1	AP-1	AndersonUCSF	APS1	R1
plate4_H8_Dual-096_20200702_AIREMUT_AP-1099_S304_R1_001_gene.csv	vacuum	AP-1099	AP-1099	AndersonUCSF	APS1	R1
plate4_G6_Dual-096_20200702_AIREMUT_AP-13_S287_R1_001_gene.csv	vacuum	AP-13	AP-13	AndersonUCSF	APS1	R1
plate4_H6_Dual-096_20200702_AIREMUT_AP-16_S288_R1_001_gene.csv	vacuum	AP-16	AP-16	AndersonUCSF	APS1	R1
plate3_A7_Dual-095_20200702_AIREMUT_AP-18_S193_R1_001_gene.csv	vacuum	AP-18	AP-18	AndersonUCSF	APS1	R1
plate3_B7_Dual-095_20200702_AIREMUT_AP-19_S194_R1_001_gene.csv	vacuum	AP-19	AP-19	AndersonUCSF	APS1	R1
plate3_C7_Dual-095_20200702_AIREMUT_AP-20_S195_R1_001_gene.csv	vacuum	AP-20	AP-20	AndersonUCSF	APS1	R1
plate3_D7_Dual-095_20200702_AIREMUT_AP-21_S196_R1_001_gene.csv	vacuum	AP-21	AP-21	AndersonUCSF	APS1	R1
plate3_E7_Dual-095_20200702_AIREMUT_AP-22_S197_R1_001_gene.csv	vacuum	AP-22	AP-22	AndersonUCSF	APS1	R1
plate3_F7_Dual-095_20200702_AIREMUT_AP-23_S198_R1_001_gene.csv	vacuum	AP-23	AP-23	AndersonUCSF	APS1	R1
plate3_G7_Dual-095_20200702_AIREMUT_AP-24_S199_R1_001_gene.csv	vacuum	AP-24	AP-24	AndersonUCSF	APS1	R1
plate3_H7_Dual-095_20200702_AIREMUT_AP-25_S200_R1_001_gene.csv	vacuum	AP-25	AP-25	AndersonUCSF	APS1	R1
plate4_A8_Dual-096_20200702_AIREMUT_AP-26_S297_R1_001_gene.csv	vacuum	AP-26	AP-26	AndersonUCSF	APS1	R1
plate4_B8_Dual-096_20200702_AIREMUT_AP-29_S298_R1_001_gene.csv	vacuum	AP-29	AP-29	AndersonUCSF	APS1	R1
plate4_B6_Dual-096_20200702_AIREMUT_AP-3_S282_R1_001_gene.csv	vacuum	AP-3	AP-3	AndersonUCSF	APS1	R1
plate4_C8_Dual-096_20200702_AIREMUT_AP-30_S299_R1_001_gene.csv	vacuum	AP-30	AP-30	AndersonUCSF	APS1	R1
plate4_D8_Dual-096_20200702_AIREMUT_AP-32_S300_R1_001_gene.csv	vacuum	AP-32	AP-32	AndersonUCSF	APS1	R1
plate4_E8_Dual-096_20200702_AIREMUT_AP-33_S301_R1_001_gene.csv	vacuum	AP-33	AP-33	AndersonUCSF	APS1	R1
plate4_C6_Dual-096_20200702_AIREMUT_AP-5_S283_R1_001_gene.csv	vacuum	AP-5	AP-5	AndersonUCSF	APS1	R1
plate4_D6_Dual-096_20200702_AIREMUT_AP-7_S284_R1_001_gene.csv	vacuum	AP-7	AP-7	AndersonUCSF	APS1	R1
plate4_E6_Dual-096_20200702_AIREMUT_AP-8_S285_R1_001_gene.csv	vacuum	AP-8	AP-8	AndersonUCSF	APS1	R1
plate4_F6_Dual-096_20200702_AIREMUT_AP-9_S286_R1_001_gene.csv	vacuum	AP-9	AP-9	AndersonUCSF	APS1	R1
plate4_G8_Dual-096_20200702_AIREMUT_N-JB_S303_R1_001_gene.csv	vacuum	N-JB	N-JB	AndersonUCSF	APS1	R1
plate3_A9_Dual-095_20200702_AIREMUT_N-TB_S209_R1_001_gene.csv	vacuum	N-TB	N-TB	AndersonUCSF	APS1	R1
plate4_F8_Dual-096_20200702_AIREMUT_OA-56_S302_R1_001_gene.csv	vacuum	OA-56	OA-56	AndersonUCSF	APS1	R1
plate3_B9_Dual-095_20200702_AIREMUT_SC_S210_R1_001_gene.csv	vacuum	SC	SC	AndersonUCSF	APS1	R1

## Sheet: Fig234567-HC
	ID	Cohort	Category	Age	Gender	Race
	HC-A1	NYBB-Ctrl	HealthyControl	20	M	White
	HC-A2	NYBB-Ctrl	HealthyControl	21	M	White
	HC-A3	NYBB-Ctrl	HealthyControl	22	F	White
	HC-A4	NYBB-Ctrl	HealthyControl	22	F	Hispanic/Latino
	HC-A5	NYBB-Ctrl	HealthyControl	22	M	Hispanic/Latino
	HC-A6	NYBB-Ctrl	HealthyControl	23	F	White
	HC-A7	NYBB-Ctrl	HealthyControl	23	M	Hispanic/Latino
	HC-A8	NYBB-Ctrl	HealthyControl	23	M	White
	HC-A9	NYBB-Ctrl	HealthyControl	24	F	Hispanic/Latino
	HC-A10	NYBB-Ctrl	HealthyControl	24	M	White
	HC-A11	NYBB-Ctrl	HealthyControl	25	F	Hispanic/Latino
	HC-A12	NYBB-Ctrl	HealthyControl	25	F	Multiple Race
	HC-B1	NYBB-Ctrl	HealthyControl	25	F	White
	HC-B2	NYBB-Ctrl	HealthyControl	25	M	Hispanic/Latino
	HC-B3	NYBB-Ctrl	HealthyControl	25	M	Hispanic/Latino
	HC-B4	NYBB-Ctrl	HealthyControl	25	M	White
	HC-B5	NYBB-Ctrl	HealthyControl	26	F	White
	HC-B6	NYBB-Ctrl	HealthyControl	27	F	White
	HC-B7	NYBB-Ctrl	HealthyControl	28	M	Black
	HC-B8	NYBB-Ctrl	HealthyControl	29	F	Hispanic/Latino
	HC-B9	NYBB-Ctrl	HealthyControl	31	F	Multiple Race
	HC-B10	NYBB-Ctrl	HealthyControl	31	M	White
	HC-B11	NYBB-Ctrl	HealthyControl	31	M	White
	HC-B12	NYBB-Ctrl	HealthyControl	32	M	Asian/Pacif.Island
	HC-C1	NYBB-Ctrl	HealthyControl	33	F	White
	HC-C2	NYBB-Ctrl	HealthyControl	33	F	White
	HC-C3	NYBB-Ctrl	HealthyControl	33	M	White
	HC-C4	NYBB-Ctrl	HealthyControl	34	F	White
	HC-C5	NYBB-Ctrl	HealthyControl	34	M	Hispanic/Latino
	HC-C6	NYBB-Ctrl	HealthyControl	35	F	Multiple Race
	HC-C7	NYBB-Ctrl	HealthyControl	35	M	White
	HC-C8	NYBB-Ctrl	HealthyControl	36	F	White
	HC-C9	NYBB-Ctrl	HealthyControl	36	F	Hispanic/Latino
	HC-C10	NYBB-Ctrl	HealthyControl	36	M	White
	HC-C11	NYBB-Ctrl	HealthyControl	37	F	White
	HC-C12	NYBB-Ctrl	HealthyControl	37	M	White
	HC-E1	NYBB-Ctrl	HealthyControl	46	F	White
	HC-E2	NYBB-Ctrl	HealthyControl	47	F	White
	HC-E3	NYBB-Ctrl	HealthyControl	47	M	White
	HC-E4	NYBB-Ctrl	HealthyControl	48	F	White
	HC-E5	NYBB-Ctrl	HealthyControl	48	F	White
	HC-E6	NYBB-Ctrl	HealthyControl	48	M	White
	HC-E7	NYBB-Ctrl	HealthyControl	48	M	White
	HC-E8	NYBB-Ctrl	HealthyControl	48	M	White
	HC-E9	NYBB-Ctrl	HealthyControl	48	M	Hispanic/Latino
	HC-E10	NYBB-Ctrl	HealthyControl	49	F	White
	HC-E11	NYBB-Ctrl	HealthyControl	49	M	White
	HC-E12	NYBB-Ctrl	HealthyControl	49	M	White
	HC-F1	NYBB-Ctrl	HealthyControl	50	F	White
	HC-F2	NYBB-Ctrl	HealthyControl	50	F	White
	HC-F3	NYBB-Ctrl	HealthyControl	51	F	White
	HC-F4	NYBB-Ctrl	HealthyControl	51	F	White
	HC-F5	NYBB-Ctrl	HealthyControl	51	F	White
	HC-F6	NYBB-Ctrl	HealthyControl	51	M	White
	HC-F7	NYBB-Ctrl	HealthyControl	52	F	Multiple Race
	HC-F8	NYBB-Ctrl	HealthyControl	52	M	White
	HC-F9	NYBB-Ctrl	HealthyControl	52	M	White
	HC-F10	NYBB-Ctrl	HealthyControl	53	M	White
	HC-F11	NYBB-Ctrl	HealthyControl	55	F	White
	HC-F12	NYBB-Ctrl	HealthyControl	55	F	Hispanic/Latino
	HC-G1	NYBB-Ctrl	HealthyControl	55	M	White
	HC-G2	NYBB-Ctrl	HealthyControl	55	M	White
	HC-G3	NYBB-Ctrl	HealthyControl	55	M	White
	HC-G4	NYBB-Ctrl	HealthyControl	56	M	White
	HC-G5	NYBB-Ctrl	HealthyControl	57	M	White
	HC-G6	NYBB-Ctrl	HealthyControl	57	M	White
	HC-G7	NYBB-Ctrl	HealthyControl	59	F	White
	HC-G8	NYBB-Ctrl	HealthyControl	59	F	Ethnic Group-Other
	HC-G9	NYBB-Ctrl	HealthyControl	60	F	White
	HC-G10	NYBB-Ctrl	HealthyControl	60	F	White
	HC-G11	NYBB-Ctrl	HealthyControl	60	M	White
	HC-G12	NYBB-Ctrl	HealthyControl	60	M	White
	HC-H1	NYBB-Ctrl	HealthyControl	61	M	White
	HC-H2	NYBB-Ctrl	HealthyControl	61	M	White
	HC-H3	NYBB-Ctrl	HealthyControl	62	F	White
	HC-H4	NYBB-Ctrl	HealthyControl	63	F	Asian/Pacif.Island
	HC-H5	NYBB-Ctrl	HealthyControl	63	F	Hispanic/Latino
	HC-H6	NYBB-Ctrl	HealthyControl	63	M	White
	HC-H7	NYBB-Ctrl	HealthyControl	64	F	White
	HC-H8	NYBB-Ctrl	HealthyControl	65	F	White
	HC-H9	NYBB-Ctrl	HealthyControl	65	F	White
	HC-H10	NYBB-Ctrl	HealthyControl	66	F	White
	HC-H11	NYBB-Ctrl	HealthyControl	66	M	White
	HC-H12	NYBB-Ctrl	HealthyControl	67	M	White
	HRHS2	DeRisi-Ctrl	HealthyControl	NA	NA	NA
	HRHS3	DeRisi-Ctrl	HealthyControl	NA	NA	NA
	ID-001	DeRisi-Ctrl	HealthyControl	NA	NA	NA
	ID-002	DeRisi-Ctrl	HealthyControl	NA	NA	NA
	ID-003	DeRisi-Ctrl	HealthyControl	NA	NA	NA
	ID-004	DeRisi-Ctrl	HealthyControl	NA	NA	NA
	ID-006	DeRisi-Ctrl	HealthyControl	NA	NA	NA
	ID-007	DeRisi-Ctrl	HealthyControl	NA	NA	NA
	ID-009	DeRisi-Ctrl	HealthyControl	NA	NA	NA
	ID-023	DeRisi-Ctrl	HealthyControl	NA	NA	NA
	1	Casanova-Ctrl	HealthyControl	NA	NA	NA
	2	Casanova-Ctrl	HealthyControl	NA	NA	NA
	3	Casanova-Ctrl	HealthyControl	49	M	NA
	4	Casanova-Ctrl	HealthyControl	47	M	NA
	5	Casanova-Ctrl	HealthyControl	61	M	NA
	6	Casanova-Ctrl	HealthyControl	39	M	NA
	7	Casanova-Ctrl	HealthyControl	43	M	NA
	8	Casanova-Ctrl	HealthyControl	24	M	NA
	9	Casanova-Ctrl	HealthyControl	64	M	NA
	10	Casanova-Ctrl	HealthyControl	35	M	NA
	11	Casanova-Ctrl	HealthyControl	45	F	NA
	12	Casanova-Ctrl	HealthyControl	41	M	NA
	13	Casanova-Ctrl	HealthyControl	33	M	NA
	14	Casanova-Ctrl	HealthyControl	66	M	NA
	15	Casanova-Ctrl	HealthyControl	21	M	NA
	16	Casanova-Ctrl	HealthyControl	42	M	NA
	17	Casanova-Ctrl	HealthyControl	18	M	NA
	18	Casanova-Ctrl	HealthyControl	20	M	NA
	19	Casanova-Ctrl	HealthyControl	35	M	NA
	20	Casanova-Ctrl	HealthyControl	18	F	NA
	21	Casanova-Ctrl	HealthyControl	42	M	NA
	22	Casanova-Ctrl	HealthyControl	44	M	NA
	23	Casanova-Ctrl	HealthyControl	46	M	NA
	24	Casanova-Ctrl	HealthyControl	39	M	NA
	25	Casanova-Ctrl	HealthyControl	37	M	NA
	26	Casanova-Ctrl	HealthyControl	48	F	NA
	27	Casanova-Ctrl	HealthyControl	51	F	NA
	28	Casanova-Ctrl	HealthyControl	33	F	NA
	29	Casanova-Ctrl	HealthyControl	54	F	NA
	30	Casanova-Ctrl	HealthyControl	45	F	NA
	31	Casanova-Ctrl	HealthyControl	24	F	NA
	32	Casanova-Ctrl	HealthyControl	39	F	NA
	33	Casanova-Ctrl	HealthyControl	47	F	NA
	34	Casanova-Ctrl	HealthyControl	40	F	NA
	35	Casanova-Ctrl	HealthyControl	65	F	NA
	36	Casanova-Ctrl	HealthyControl	42	M	NA
	37	Casanova-Ctrl	HealthyControl	51	M	NA
	38	Casanova-Ctrl	HealthyControl	35	M	NA
	39	Casanova-Ctrl	HealthyControl	61	M	NA
	40	Casanova-Ctrl	HealthyControl	57	M	NA
	41	Casanova-Ctrl	HealthyControl	26	F	NA
	42	Casanova-Ctrl	HealthyControl	49	F	NA
	43	Casanova-Ctrl	HealthyControl	22	F	NA
	44	Casanova-Ctrl	HealthyControl	22	M	NA
	45	Casanova-Ctrl	HealthyControl	23	M	NA
	46	Casanova-Ctrl	HealthyControl	54	M	NA
	47	Casanova-Ctrl	HealthyControl	63	M	NA
	48	Casanova-Ctrl	HealthyControl	53	M	NA
	49	Casanova-Ctrl	HealthyControl	30	F	NA
	50	Casanova-Ctrl	HealthyControl	47	M	NA
	51	Casanova-Ctrl	HealthyControl	22	M	NA
	52	Casanova-Ctrl	HealthyControl	60	F	NA
	53	Casanova-Ctrl	HealthyControl	53	M	NA
	54	Casanova-Ctrl	HealthyControl	44	M	NA
	55	Casanova-Ctrl	HealthyControl	46	F	NA
	56	Casanova-Ctrl	HealthyControl	46	F	NA
	57	Casanova-Ctrl	HealthyControl	63	M	NA
	58	Casanova-Ctrl	HealthyControl	55	M	NA
	59	Casanova-Ctrl	HealthyControl	36	M	NA
	60	Casanova-Ctrl	HealthyControl	45	F	NA
	63	Casanova-Ctrl	HealthyControl	NA	NA	NA
	64	Casanova-Ctrl	HealthyControl	NA	NA	NA
	65	Casanova-Ctrl	HealthyControl	NA	NA	NA
	66	Casanova-Ctrl	HealthyControl	NA	NA	NA
	67	Casanova-Ctrl	HealthyControl	NA	NA	NA
	68	Casanova-Ctrl	HealthyControl	NA	NA	NA
	69	Casanova-Ctrl	HealthyControl	NA	NA	NA
	70	Casanova-Ctrl	HealthyControl	NA	NA	NA
	71	Casanova-Ctrl	HealthyControl	NA	NA	NA
	72	Casanova-Ctrl	HealthyControl	NA	NA	NA
	73	Casanova-Ctrl	HealthyControl	NA	NA	NA
	74	Casanova-Ctrl	HealthyControl	NA	NA	NA
	75	Casanova-Ctrl	HealthyControl	NA	NA	NA
	76	Casanova-Ctrl	HealthyControl	NA	NA	NA
	77	Casanova-Ctrl	HealthyControl	NA	NA	NA
	78	Casanova-Ctrl	HealthyControl	NA	NA	NA
	79	Casanova-Ctrl	HealthyControl	NA	NA	NA
	80	Casanova-Ctrl	HealthyControl	NA	NA	NA
	81	Casanova-Ctrl	HealthyControl	NA	NA	NA
	82	Casanova-Ctrl	HealthyControl	NA	NA	NA
	83	Casanova-Ctrl	HealthyControl	NA	NA	NA
	84	Casanova-Ctrl	HealthyControl	NA	NA	NA
	85	Casanova-Ctrl	HealthyControl	NA	NA	NA
	86	Casanova-Ctrl	HealthyControl	NA	NA	NA
	87	Casanova-Ctrl	HealthyControl	NA	NA	NA
	88	Casanova-Ctrl	HealthyControl	NA	NA	NA
	89	Casanova-Ctrl	HealthyControl	NA	NA	NA
	90	Casanova-Ctrl	HealthyControl	NA	NA	NA
	91	Casanova-Ctrl	HealthyControl	NA	NA	NA
	92	Casanova-Ctrl	HealthyControl	NA	NA	NA
	93	Casanova-Ctrl	HealthyControl	NA	NA	NA
	94	Casanova-Ctrl	HealthyControl	NA	NA	NA
	95	Casanova-Ctrl	HealthyControl	NA	NA	NA
	96	Casanova-Ctrl	HealthyControl	NA	NA	NA
	97	Casanova-Ctrl	HealthyControl	NA	NA	NA
	98	Casanova-Ctrl	HealthyControl	NA	NA	NA
	99	Casanova-Ctrl	HealthyControl	NA	NA	NA
	100	Casanova-Ctrl	HealthyControl	NA	NA	NA
	19010	Casanova-Ctrl	HealthyControl		M	NA
	19097	Casanova-Ctrl	HealthyControl	38	M	NA

## Sheet: Fig5-IPEX
Sample No.	FOXP3 cDNA	FOXP3 Protein or Mutation Effect	IPEX Participant #	Sample format	Pre/post transplant	Enteropathy	Watery diarrhea	Mucus / Bloody diarrhea	Villous atrophy	Food Allergies	FTT	Eczema	Erythroderma	Alopecia	T1D	Thyroiditis	Anemia	Thrombocytopenia	Neutropenia	Pulm	CV	Nephropathy	Hepatitis	Seizures	Ventriculomegaly	Dev Delay	Staph infections	Bacterial infections, sepsis, pneumonia, etc.	CMV infections	Other viral infections	Candida	Lymphadenopathy	Arthritis / Vasculitis	Hyper-IgE	Other Clinical Features
1	c.694T>G	p.C232G	1155027	Plasma	Pre	1	1	0	0	1	1	1	0	0	0	0	0	0	0	0	0	0	0	0	0	0	0	1	0			0	0
2	c.454+4A>G	Splicing	1155008	Serum	Pre	1	1	1	0	1	0	1	0	0	0	0	0	0	0	0	0	0	0	0	0	0	0	0	0		0	0	0
3	c.542G>C	p.S181T	1155040	Serum	Pre	1	1	0	1	0	0	1	0	0	0	0	0	0	0	1	0	1	1	0	0	0	0	1	0		0	1	0
4	c.816+7C>G	Splicing	1155006	Serum	Pre	1	1	1	0	0	0	1	0	0	1	1	0	0	0	1	0	1	0	1	1	0	0	1	0		1	1	0
5	c.1190G>A	p.R397Q	1155039	Serum	Pre	1	1	0	0	0	1	1	0	0	0	0	0	0	0	0	0	0	0	0	0	0	0	0	0		0	0	0	N/A
6	AAUAAA>AAUGAA	Poly-A Signal	1155005	Plasma	Pre	0	0	0	0	0	0	1	0	0	0	0	0	0	0	0	0	0	0	0	0	0	0	0	0		0	0	0
7	c.816 +5 G>A	Splicing	1155056	Plasma	Pre	1	1	0	0	0	0	1	0	0	0	0	0	0	0	0	0	0	0	0	0	0	0	0	0		0	0	0	N/A
8	c.1226A>C	p.D409A	1155009	Plasma	Pre	1	1	0	1	1	1	1	0	0	0	1	0	0	0	0	0	0	0	0	0	0	0	0	0		0	0	0
9	c.1227_1235delTGAGCTGGA	p.D409E_ELE410_412del	1155028	Plasma	Pre	1	1	0	1	0	1	1	0	0	1	0	1	1	0	0	0	0	0	0	0	0	0	0	0		0	0	0	N/A
10	c.1150G>A	p.A384T	1155055	Plasma	Pre	1	1	0	1	0	1	1	0	0	0	1	0	0	0	0	0	1	0	0	0	1	1	0	0		0	0	0
11	c.1226A>C	p.M370V	1155057	Plasma	Pre	1	1	0	0	0	0	1	0	0	1	1	0	0	0	0	0	0	0	0	0	0	0	0	0		0	0	0	N/A
12	c.1150G>A	p.A384T	1155013	Plasma	Pre	1	1	1	1	0	1	1	0	1	1	0	1	1	1	1	0	1	0	0	0	0	1	0	0		0	1	0
13	c.340C>T	p. R114W	1155054	Plasma	Pre	0	0	0	0	0	0	0	0	0	1	1	0	0	0	0	0	0	0	0	0	0	0	0	0		0	0	0	N/A
14	c.1150G>A	p.A384T	1155052	Serum	Pre	1	1	0	0	0	1	1	0	0	0	0	0	0	0	0	0	0	0	0	0	0	0	0	0		0	0	0	N/A
15	c.767T>C	pM256T	1155016	Plasma	Pre	1	1	0	1	1	1	1	0	0	1	0	0	0	0	1	0	1	0	0	0	0	0	0	0	Adenovirus pneumonia	0	0	0
16	c.1150G>A	p.A384T	1155003	Plasma	Pre	1	1	0	1	0	1	1	0	0	0	1	1	1	0	0	0	0	0	0	0	0	1	0	1		0	0	0	N/A
17	c.1087A>G	p.I363V	1155022	Plasma	Pre	1	1	0	1	0	0	0	0	0	0	0	1	1	0	0	0	0	0	0	0	0	1	0	0		0	0	0
18	c.1150G>A	p.A384T	1155047	Serum	Pre	1	1	1	0	1	1	1	1	1	1	0	0	0	0	0	0	0	0	0	0	1	0	0	0		1	1	0
19	c.994A>G	p.K332E	1155053	Plasma	Pre	1	1	0	0	0	0	1	0	0	1	0	0	0	0	1	0	0	0	0	0	1	0	0	0		0	0	0		Myositis
20	c.210+2delT	Splicing	1155007	Serum	Pre	1	1	0	1	0	1	1	0	0	1	0	1	1	1	0	0	1	0	1	0	0	1	1	1		1	0	0
21	c.817G>T	p.A237S	1155018	Plasma	Pre	1	1	0	1	1	0	1	0	0	0	1	1	0	0	0	0	0	0	0	0	0	0	0	1	Rotavirus	0	0	1
22	c.1157G>A	p.R386H	1155044	Plasma	Pre	1	1	0	0	0	1	1	0	0	0	1	0	0	0	0	0	0	0	0	0	0	0	0	0		0	0	0
23	c.210+1G>T	Splicing	1155025	Plasma	Pre	1	1	0	0	0	0	1	0	0	0	0	1	0	0	1	0	1	1	1	0	1	0	1	0		0	0	0
24	c.-23+1G>T	Splicing	1155021	Plasma	Pre	1	1	1	0	0	0	1	0	0	1	1	0	0	0	0	0	0	0	0	0	0	0	0	0		0	0	0
25	c.748_750delAAG	p.K250del	1155001	Plasma	Pre	1	1	0	1	0	1	0	0	0	0	0	0	0	0	0	0	0	0	0	0	0	1	0	0		0	0	0
26	AAUAAA>AAUGAA	Poly-A Signal	1155019	Plasma	Pre 1st tx	1	1	0	0	0	1	1	0	0	0	0	0	0	0	0	0	1	0	0	0	1	0	0	0		0	0	0	N/A
27	c.1169G>A	p.S390N	1155012	Serum	Pre	1	1	0	1	0	1	1	0	0	1	0	0	0	0	0	0	0	0	0	0	1	0	1	0		0	0	0

## Sheet: Fig5-RAG
ID	AssignedPhIPSeqCategory	Notes	Phenotype	Type of autoimmunity
NIH001	RAGHYP		CID-G
NIH002	RAGHYP		SCID
NIH003	RAGHYP	anti-BEST4+	CID-AI	Inflammatory bowel disease, autoimmune hemolytic anemia, immune complex glomerulonephritis
NIH004	RAGHYP-CTRL
NIH005	RAGHYP		CID-G/AI	alopecia, autoimmune hypothyroidism, autoimmune hypogonadism
NIH006	RAGHYP		CID-AI	autoimmune myositis, alopecia
NIH007	RAGHYP	anti-BEST4+	CID-G/AI	ITP, lung granulomas
NIH008	RAGHYP		AS
NIH009	RAGHYP		CID-G/AI	no data available
NIH010	RAGHYP		ICL
NIH011	RAGHYP-CTRL
NIH012	RAGHYP-CTRL
NIH013	RAGHYP-CTRL
NIH014	RAGHYP-CTRL
NIH016	RAGHYP-CTRL
NIH018	RAGHYP-CTRL
NIH019	RAGHYP-CTRL
NIH020	RAGHYP-CTRL
NIH021	RAGHYP-CTRL
NIH022	RAGHYP		Omenn	ITP, autoimmune hemolytic anemia
NIH023	RAGHYP		AS
NIH024	RAGHYP		CID-AI	ANA, anti-ds DNA Ab
NIH025	RAGHYP		AS	autoimmune hemolytic anemia
NIH026	RAGHYP		CID-G
NIH027	RAGHYP		AS
NIH028	RAGHYP		AS
NIH029	RAGHYP		CID
NIH031	RAGHYP		Omenn
NIH032	RAGHYP		SCID
NIH033	RAGHYP		AS	autoimmune hemolytic anemia
NIH034	RAGHYP		Omenn
NIH035	RAGHYP		SCID
NIH036	RAGHYP		CID-AI	Miller-Fisher syndrome (variant of Guillain-Barre')
NIH037	RAGHYP		SCID
NIH038	RAGHYP		Omenn
NIH039	RAGHYP		Omenn
NIH040	RAGHYP		AS	autoimmune hemolytic anemia
NIH041	RAGHYP		AS	autoimmune hemolytic anemia, ANA, autoimmune hypothyrodism
NIH042	RAGHYP		CID-G/AI	autoimmune hemolytic anemia
NIH043	RAGHYP		CID-AI	neutropenia, ANA
NIH045	RAGHYP		SCID
NIH047	RAGHYP		ICL
NIH048	RAGHYP		CID-AI	autoimmune hemolytic anemia
NIH049	RAGHYP		SCID
NIH051	RAGHYP		CID-G
NIH052	RAGHYP		SCID
NIH053	RAGHYP	same as BSI02946	CID-G/AI	alopecia, autoimmune hypothyroidism, autoimmune hypogonadism
NIH054	RAGHYP		SCID
NIH056	RAGHYP		CID-G/AI	ITP, neutropenia
NIH057	RAGHYP		AS	autoimmune hemolytic anemia
NIH058	RAGHYP-CTRL
NIH060	RAGHYP-CTRL
NIH061	RAGHYP-CTRL
NIH062	RAGHYP		Omenn
NIH063	RAGHYP		Omenn
NIH064	RAGHYP		SCID
NIH066	RAGHYP		AS
NIH069	RAGHYP		Omenn
NIH070	RAGHYP		AS	autoimmune hemolytic anemia
NIH071	RAGHYP		SCID
NIH072	RAGHYP		AS
NIH073	RAGHYP		SCID
NIH074	RAGHYP-CTRL
NIH075	RAGHYP		SCID
NIH076	RAGHYP		AS	autoimmune hemolytic anemia, ITP, vitiligo, neutropenia, Guillain-Barre, psoriasis, anti-TPO antibodied
NIH077	RAGHYP		AS
NIH078	RAGHYP		SCID
NIH079	RAGHYP		SCID
NIH080	RAGHYP		AS
NIH081	RAGHYP		CID-G
NIH082	RAGHYP-CTRL
NIH084	RAGHYP		AS
NIH085	RAGHYP		CID
NIH086	RAGHYP		AS	autoimmune hemolytic anemia
NIH087	RAGHYP		Omenn
NIH088	RAGHYP		Omenn
NIH089	RAGHYP		AS	autoimmune hemolytic anemia, thrombocytopenia
NIH090	RAGHYP-CTRL
NIH092	RAGHYP-CTRL
NIH093	RAGHYP-CTRL
NIH094	RAGHYP-CTRL
NIH095	RAGHYP-CTRL
NIH096	RAGHYP-CTRL

## Sheet: Fig6-MISC-COVID
ID	Cohort	Type	Age	Gender(M=M, F=F)	ESR	CRP	ICU?	O2?	Resp?	ECMO?	Ethnicity	Initial Disposition	Highest level of Care	hospital admission	Non-invasive oxygenation	Transferred to ICU	Mechanical ventilation	Pressors	Death	Length of Stay
19021	CasanovaRI	MIS-C	16	F	NA	NA	NA	NA	NA	NA
19292	CasanovaRI	MIS-C	17	M	NA	NA	NA	NA	NA	NA
19310	CasanovaRI	MIS-C	4	M	NA	NA	NA	NA	NA	NA
19508	CasanovaRI	MIS-C	17	F	NA	NA	NA	NA	NA	NA
19529	CasanovaRI	MIS-C	2	F	NA	NA	NA	NA	NA	NA
19530	CasanovaRI	MIS-C	5	M	NA	NA	NA	NA	NA	NA
19625	CasanovaRI	MIS-C	9	F	NA	NA	NA	NA	NA	NA
19626	CasanovaRI	MIS-C	17	M	NA	NA	NA	NA	NA	NA
19629	CasanovaRI	MIS-C	11	F	NA	NA	NA	NA	NA	NA
203040	BurnsUCSD	MIS-C	5.99602	M	22	19.8	No	No	No	No
203041	BurnsUCSD	MIS-C	11.2965	M	36	19.6	No	No	No	No
203044	BurnsUCSD	MIS-C	12.8901	F	33	5.5	No	No	No	No
203046	BurnsUCSD	MIS-C	15.9593	F	90	20.7	No	No	No	No
203050	BurnsUCSD	MIS-C	10.5107	M	65	26.8	Yes	Yes	Yes	No
203055	BurnsUCSD	MIS-C	7.83041	M	48	21.3	No	No	No	No
203060	BurnsUCSD	MIS-C	9.71124	M	44	23.8	No	No	No	No
203061	BurnsUCSD	MIS-C	4.75837	M	38	15.7	No	No	No	No
203063	BurnsUCSD	MIS-C	13.1967	M	37	29.2	Yes	No	No	Yes
203064	BurnsUCSD	MIS-C	10.4642	M	59	31.3	Yes	Yes	No	Yes
204026	BurnsUCSD	MIS-C	3.90973	F	10	1.5	No	No	No	No
4099	BurnsUCSD	Viral sx	1.88094	M	56	5.1
4230	BurnsUCSD	Viral sx	5.08429	M	20	1.6
4232	BurnsUCSD	Viral sx	0.88982	F	28	0.9
4296	BurnsUCSD	Viral sx	5.24583	F	44	1.2
4309	BurnsUCSD	Viral sx	0.728397	M	52	1.8
4343	BurnsUCSD	Viral sx	1.48657	F	52	1.9	No	No	No	No
4352	BurnsUCSD	Viral sx	1.30313	M	14	0.3
4456	BurnsUCSD	Viral sx	1.06505	M	46	na
4479	BurnsUCSD	Viral sx	12.1398	F	17	0.5
4505	BurnsUCSD	Viral sx	3.82486	F	66	0.5
4592	BurnsUCSD	Viral sx	4.85978	M	15	6.9
4593	BurnsUCSD	Viral sx	3.48798	M	29	0.5
4621	BurnsUCSD	Viral sx	1.14718	F	20	0.5	No	No	No	No
4696	BurnsUCSD	Viral sx	1.90285	F	61	2.4
4776	BurnsUCSD	Viral sx	3.6413	F	9	0.5
4925	BurnsUCSD	Viral sx	8.6462	F	25	4.3
4955	BurnsUCSD	Viral sx	2.18759	M	18	1
4984	BurnsUCSD	Viral sx	2.12188	F	21	17.7
194045	BurnsUCSD	Viral sx	7.28819	M	9	1.4
194103	BurnsUCSD	Viral sx	3.31298	F	15	2.9
Lynch_017	LynchSFGH	MM-COVID	26	Male							Hispanic or Latino	Discharged	Discharged	0	0	0	0	0	0	1
Lynch_051	LynchSFGH	MM-COVID	25	Male							Hispanic or Latino	Discharged	Discharged	0	0	0	0	0	0	0
Lynch_059	LynchSFGH	MM-COVID	22	Male							Hispanic or Latino	Discharged	Discharged	0	0	0	0	0	0	0
Lynch_072	LynchSFGH	MM-COVID	28	Male							Hispanic or Latino	Discharged	Discharged	0	0	0	0	0	0	0
Lynch_085	LynchSFGH	MM-COVID	16	Male							Hispanic or Latino	Discharged	Discharged	0	0	0	0	0	0	0
Lynch_104	LynchSFGH	MM-COVID	29	Male							Hispanic or Latino	Discharged	Discharged	0	0	0	0	0	0	1
Lynch_108	LynchSFGH	MM-COVID	27	Female							Hispanic or Latino	Floor	Floor	1	0	0	0	0	0	2
Lynch_110	LynchSFGH	MM-COVID	30	Male							Hispanic or Latino	Discharged	Discharged	0	0	0	0	0	0	0
Lynch_111	LynchSFGH	MM-COVID	23	Female							Hispanic or Latino	Discharged	Discharged	0	0	0	0	0	0	1
Lynch_112	LynchSFGH	MM-COVID	29	Male							White	Discharged	Discharged	0	0	0	0	0	0	1
Lynch_201	LynchSFGH	MM-COVID	26	Male							Hispanic or Latino	Discharged	Discharged	0	0	0	0	0	0	0
Lynch_227	LynchSFGH	MM-COVID	18	Female							Hispanic or Latino	Discharged	Discharged	0	0	0	0	0	0	0
Lynch_239	LynchSFGH	MM-COVID	23	Female							Asian	Discharged	Discharged	0	0	0	0	0	0	0
Lynch_253	LynchSFGH	MM-COVID	21	Female							Hispanic or Latino	Discharged	Discharged	0	0	0	0	0	0	0
Lynch_260	LynchSFGH	MM-COVID	25	Male							Hispanic or Latino	Discharged	Discharged	0	0	0	0	0	0	0
Lynch_270	LynchSFGH	MM-COVID	27	Female							Hispanic or Latino	Discharged	Discharged	0	0	0	0	0	0	1
Lynch_276	LynchSFGH	MM-COVID	23	Male							Black or African-American	Discharged	Discharged	0	0	0	0	0	0	0
Lynch_298	LynchSFGH	MM-COVID	27	Female							Not Hispanic or Latino	Discharged	Discharged	0	0	0	0	0	0	0
Lynch_306	LynchSFGH	MM-COVID	19	Male							Native Hawaiian or Pacific Islander	Discharged	Discharged	0	0	0	0	0	0	0
Lynch_312	LynchSFGH	MM-COVID	31	Male							Asian	Discharged	Discharged	0	0	0	0	0	0	0

## Sheet: Fig6-KD
	ID	Cohort	Type	Age	Gender(M=M, F=F)	ESR	CRP	z-echo	ICU?	O2?	Resp?	ECMO?
	3113	BurnsUCSD	KD	0.706494	M	103	10.3	1.59075
	3118	BurnsUCSD	KD	0.446393	M	81	6	1.56
	3139	BurnsUCSD	KD	6.90774	F	119	22.9	2.3081
	3140	BurnsUCSD	KD	1.36336	M	56	8.3	2.10259
	3143	BurnsUCSD	KD	12.3232	F	58	0.3	2.25255
	3157	BurnsUCSD	KD	5.13905	F	75	4.5	-0.0649461
	3205	BurnsUCSD	KD	3.98639	F	114	12	1.65592
	3273	BurnsUCSD	KD	1.75762	M	76	2.9	1.71
	3332	BurnsUCSD	KD	10.8831	F	66	7	0.53
	3383	BurnsUCSD	KD	0.635194	F	20	2.8	1.12
	3406	BurnsUCSD	KD	3.10479	F	102	4.1	2.23
	3423	BurnsUCSD	KD	4.50123	F	31	11.4	2.02152
	3558	BurnsUCSD	KD	1.97951	M	41	0.8	0.72
	3598	BurnsUCSD	KD	3.77546	M	16	1.7	1.36	No	No	No	No
	3609	BurnsUCSD	KD	5.48962	M	44	2.3	1.65
	3615	BurnsUCSD	KD	2.71886	F	73	0.9	1.86
	3618	BurnsUCSD	KD	4.7011	M	140	1.5	0.98
	3637	BurnsUCSD	KD	4.35042	F	56	1.5	2.02
	3665	BurnsUCSD	KD	3.84128	F	70	7.2	1.26
	3695	BurnsUCSD	KD	2.0151	M	66	1	1.2
	3751	BurnsUCSD	KD	3.2143	F	116	8.6	2.41	No	No	No	No
	3765	BurnsUCSD	KD	5.18845	F	79	3.8	1.2
	3787	BurnsUCSD	KD	2.39852	M	7	15.3	1.6
	3791	BurnsUCSD	KD	1.76595	M	37	2.6	1.3
	3799	BurnsUCSD	KD	4.1096	M	20	1.6	1.3
	3800	BurnsUCSD	KD	2.30794	F	48	15.5	1.6
	3817	BurnsUCSD	KD	13.8593	M	28	5.5	1.42
	3829	BurnsUCSD	KD	2.07533	F	84	34.3	2.09	No	No	No	No
	3853	BurnsUCSD	KD	8.65738	M	42	5.5	2.18
	3855	BurnsUCSD	KD	6.52728	F	54	3.1	1.22
	3876	BurnsUCSD	KD	2.76529	M	1	21.9	1.77
	3917	BurnsUCSD	KD	0.999336	M	68	6	1.83
	3947	BurnsUCSD	KD	1.46763	M	51	7.8	1.45	No	No	No	No
	153031	BurnsUCSD	KD	1.47573	M	39	1.2	1.2
	153034	BurnsUCSD	KD	2.0151	F	44	2.8	1.41
	153043	BurnsUCSD	KD	2.34353	F	64	3.4	1.77
	153058	BurnsUCSD	KD	2.50507	F	11	24.2	1.88	No	No	No	No
	153082	BurnsUCSD	KD	9.07901	F	56	8.6	1.22	No	No	No	No
	163014	BurnsUCSD	KD	6.48074	M	76	2.1	-0.85
	163022	BurnsUCSD	KD	2.79004	M	74	19.7	1.19
	163057	BurnsUCSD	KD	5.08703	M	30	5.3	1.95	No	No	No	No
	163058	BurnsUCSD	KD	2.54066	M	54	1.7	1.23
	163065	BurnsUCSD	KD	3.68237	F	105	16.7	1.87
	163081	BurnsUCSD	KD	1.63989	M	64	6.2	1.66
	163099	BurnsUCSD	KD	2.07545	M	37	3.5	1.86
	163118	BurnsUCSD	KD	13.6568	F	72	4.9	0.03
	173030	BurnsUCSD	KD	0.733759	M	49	2.8	1.85
	173033	BurnsUCSD	KD	1.66191	F	90	20.5	2.19
	173040	BurnsUCSD	KD	1.12243	F	32	0.5	1.02
	173058	BurnsUCSD	KD	2.68862	M	65	24.9	1.36
	173062	BurnsUCSD	KD	3.81938	F	31	8.8	1.68
	183002	BurnsUCSD	KD	10.9982	M	45	1.9	0.6
	183010	BurnsUCSD	KD	0.933626	F	50	3.7	1.09
	183012	BurnsUCSD	KD	0.930888	F	27	0.5	1.02
	183074	BurnsUCSD	KD	2.92397	M	66	1.4	2.49
	183084	BurnsUCSD	KD	3.85771	M	67	4.9	1.2
	183085	BurnsUCSD	KD	2.86933	F	140	18.2	2.27
	193000	BurnsUCSD	KD	4.36434	M	64	8.3	1.78
	193009	BurnsUCSD	KD	4.27672	M	114	5	-0.07
	193016	BurnsUCSD	KD	9.1583	M	65	4.7	0.74
	193018	BurnsUCSD	KD	8.55881	M	68	4	1.07
	193031	BurnsUCSD	KD	9.96872	F	19	2.9	1.03
	193062	BurnsUCSD	KD	3.63868	F	66	3.3	0.79
	193068	BurnsUCSD	KD	13.0571	F	48	1.3	0.19	No	No	No	No
	193086	BurnsUCSD	KD	3.23894	F	76	8.9	1.76
	193103	BurnsUCSD	KD	4.41351	M	20	1.5	0.55
	193116	BurnsUCSD	KD	2.93777	M	69	1.6	1.12
	203010	BurnsUCSD	KD	2.28627	M	40	5.5	1.4
	203016	BurnsUCSD	KD	3.33215	F	60	4.1	1

## Sheet: Fig7-SevCOVID
ID	Status	Disease	Gender	Age	Phenotype	Phenotype
15294					MM
18978	patient	Covid19	M	48	SC	Pulmonary
18979	patient	Covid19	M	45	SC	Pulmonary
18980	patient	Covid19	M	41	SC	Pulmonary
18981	patient	Covid19	F	49	SC	Pulmonary
18982	patient	Covid19	F		SC	Pulmonary
18983	patient	Covid19	F	32	SC	Pulmonary
18984	patient	Covid19	M	39	SC	Pulmonary
18985	patient	Covid19	M	46	SC	Pulmonary
18986	patient	Covid19	M	48	SC	Pulmonary
18987	patient	Covid19	M	37	SC	Pulmonary
18988	patient	Covid19	F	50	SC	Pulmonary
18989	patient	Covid19	M	35	SC	Pulmonary
18993	patient	Covid19	M	<1	SC	Pulmonary
19001	patient	Covid19	M	13	SC	Pulmonary
19002	patient	Covid19	F	6	SC	Pulmonary
19003	healthy	Covid19	M	44	MM
19004	patient	Covid19	F	19	SC	Pulmonary
19005	patient	Covid19	M	42	SC	Pulmonary
19006	patient	Covid19	F	45	SC	Pulmonary
19007	patient	Covid19	M	44	SC	Pulmonary
19008	patient	Covid19	M	40	SC	Pulmonary
19009	patient	Covid19	M	39	SC	Pulmonary
19011	patient	Covid19	F	35	SC	Pulmonary
19012	patient	Covid19	F	32	SC	Pulmonary
19013	patient	Covid19	M	29	SC	Pulmonary
19014	patient	Covid19	F	2	MM
19016	patient	Covid19	M	52	SC	Pulmonary
19017	patient	Covid19	M	41	SC	Pulmonary
19018	patient	Covid19	M	50	SC	Pulmonary
19019	patient	Covid19	M	46	SC	Pulmonary
19020	patient	Covid19	M	47	SC	Pulmonary
19022	healthy	Covid19	M	42	MM
19024	patient	Covid19	M	42	SC	Pulmonary
19025	patient	Covid19	M	40	SC	Pulmonary
19026	patient	Covid19	M	45	SC	Pulmonary
19027	patient	Covid19	M	36	SC	Pulmonary
19028	patient	Covid19	M	42	SC	Pulmonary
19029	patient	Covid19	F	0,5	SC	Pulmonary
19030	patient	Covid19	M	42	SC	Pulmonary
19031	patient	Covid19	F	34	SC	Pulmonary
19032	patient	Covid19	M	41	MM
19036	patient	Covid19	F	52	SC	Pulmonary
19038	patient	Covid19	M	34	SC	Pulmonary
19039	patient	Covid19	M	28	SC	Pulmonary
19040	patient	Covid19	M	25	SC	Pulmonary
19041	patient	Covid19	M	45	MM
19042	patient	Covid19	M	34	SC	Pulmonary
19043	patient	Covid19	M	47	MM
19045	patient	Covid19	F	19	MM
19047	patient	Covid19	M	41	MM
19049	patient	Covid19	M	40	SC	Pulmonary
19054	patient	Covid19	M	50	SC	Pulmonary
19056	patient	Covid19	F	72	MM
19080	patient	Covid19	M	46	SC	Pulmonary
19081	patient	Covid19	M	44	SC	Pulmonary
19082	patient	Covid19	M	36	SC	Pulmonary
19083	patient	Covid19	M	47	SC	Pulmonary
19086	healthy	Covid19	F	49	MM
19087	healthy affected	Covid19	M	66	SC	Pulmonary
19088	patient	Covid19	M	43	SC	Pulmonary
19089	patient	Covid19	M	44	SC	Pulmonary
19090	patient	Covid19	M	30	SC	Pulmonary
19091	patient	Covid19	M	38	SC	Pulmonary
19092	patient	Covid19	M	49	SC	Pulmonary
19093	patient	Covid19	F	48	SC	Pulmonary
19094	patient	Covid19	F	50	SC	Pulmonary
19095	patient	Covid19	M	22	SC	Pulmonary
19098	patient	Covid19	M	47	SC	Pulmonary
19151	patient	Covid19	M	42	MM
19188	patient	Covid19	M	45	SC	Pulmonary
19192	patient	Covid19	F	49	SC	Pulmonary
19201	patient	Covid19	M	46	MM
19202	patient	Covid19	M	13	MM
19203	healthy	Covid19	M		MM
19204	healthy	Covid19	F		MM
19217	patient	Covid19	M	27	MM
19218	patient	Covid19	M	39	SC	Pulmonary
19219	patient	Covid19	M	<1	MM
19235	cousin	Covid19	M		MM
19236	patient	Covid19	M	33	SC	Pulmonary
19237	patient	Covid19	M	43	SC	Pulmonary
19238	patient	Covid19	M	56	SC	Pulmonary
19239	patient	Covid19	M	54	SC	Pulmonary
19240	patient	Covid19	M	51	SC	Pulmonary
19242	healthy	Covid19	M	49	MM
19243	healthy	Covid19	M	47	MM
19244	healthy	Covid19	M	43	MM
19293	patient	Covid19	M	46	MM
19294	patient	Covid19	M	24	SC	Pulmonary
19295	patient	Covid19	M	25	SC	Pulmonary
19296	patient	Covid19	M	43	SC	Pulmonary
19297	patient	Covid19	M	44	SC	Pulmonary
19298	patient	Covid19	M	50	MM
19299	patient	Covid19	M	49	MM
19300	patient	Covid19	M	13	MM
19301	patient	Covid19	M	5	MM
19302	patient	Covid19	M	14	MM
19306	Healthy	Covid19	F		MM
19307	patient	Covid19	F	35	MM
19312	patient	Covid19	M	43	MM
19368	patient	Covid19	M	53	SC	Pulmonary
19369	patient	Covid19	M	46	MM
19370	patient	Covid19	M	8	MM
19371	healthy	Covid19	M	43	MM
19372	healthy	Covid19	F	41	MM
19421	patient	Covid19	M	11	MM
19422	healthy	Covid19	M		MM
19423	healthy	Covid19	F		MM
19424	patient	Covid19	M	28	MM
19425	patient	Covid19	M	33	MM
19430	patient	Covid19	M	17	SC	Pulmonary
19491	healthy	Covid19	M		MM
19493	patient	Covid19		38	MM
19505	patient	Covid19	F	1m	SC	Pulmonary
19506	healthy	Covid19	F		MM
19509	patient	Covid19	M	37	SC	Pulmonary
19510	patient	Covid19	M	20	SC	Pulmonary
19511	patient	Covid19	M	36	SC	Pulmonary
19512	healthy	Covid19	F		MM
19513	patient	Covid19	M		MM
19528	healthy	Covid19	M	36	MM
19596	patient	Covid19	F	31	MM
19597	patient	Covid19	M	42	MM
19606	healthy	Covid19	F	34	MM
19628	patient	Covid19	M	61	MM
19630	healthy	Covid19	M	48	MM
19631	healthy	Covid19	F	41	MM
19632	healthy	Covid19	F	19	MM
19634	patient	Covid19			SC	Pulmonary
19635	patient	Covid19			SC	Pulmonary
19636	patient	Covid19			SC	Pulmonary
19637	patient	Covid19			SC	Pulmonary
19638	patient	Covid19			SC	Pulmonary
19641	patient	Covid19			SC	Pulmonary
19650	patient	Covid19			SC	Pulmonary
19651	patient	Covid19			SC	Pulmonary
19652	patient	Covid19			SC	Pulmonary
19653	patient	Covid19			SC	Pulmonary
19654	patient	Covid19			SC	Pulmonary
19655	patient	Covid19			SC	Pulmonary
19656	patient	Covid19			SC	Pulmonary
19657	patient	Covid19			SC	Pulmonary
19666	patient	Covid19			SC	Pulmonary
19667	patient	Covid19			SC	Pulmonary
19668	patient	Covid19			SC	Pulmonary
19669	patient	Covid19			SC	Pulmonary
19670	patient	Covid19			SC	Pulmonary
19671	patient	Covid19			SC	Pulmonary
19672	patient	Covid19			SC	Pulmonary
19673	patient	Covid19			SC	Pulmonary
19682	patient	Covid19			SC	Pulmonary
19683	patient	Covid19			SC	Pulmonary
19684	patient	Covid19			SC	Pulmonary
19685	patient	Covid19			SC	Pulmonary
19686	patient	Covid19			SC	Pulmonary
19687	patient	Covid19			SC	Pulmonary
19688	patient	Covid19			SC	Pulmonary
19689	patient	Covid19			SC	Pulmonary
19699	patient	Covid19			SC	Pulmonary
19700	patient	Covid19			SC	Pulmonary
19701	patient	Covid19			SC	Pulmonary
19702	patient	Covid19			SC	Pulmonary
19703	patient	Covid19			SC	Pulmonary
19704	patient	Covid19			SC	Pulmonary
19705	patient	Covid19			SC	Pulmonary
19706	patient	Covid19			SC	Pulmonary
19707	patient	Covid19			SC	Pulmonary
19739	patient	Covid19			MM
19740	patient	Covid19			MM
19741	patient	Covid19			MM
19744					MM
